# Supplementary material for: Protocadherin-7 Regulates Osteoclast Differentiation through Intracellular SET-Binding Domain-Mediated RhoA and Rac1 Activation
Source: MDPI journal article supplement (doi:10.3390/ijms222313117), 2021-12-04
Supplement: s1 [file s1]

## **Materials and methods S1**

### **Reverse transcription and real-time PCR (Q-PCR)**

Total RNAs were extracted from cells using Trizol reagent (Invitrogen), and 1–5 µg of total RNA was reverse-transcribed using random hexamer primers and SuperScript III reverse transcriptase (Invitrogen). cDNA corresponding to 10 ng of total RNA was analyzed by Q-PCR using a QuantStudio3 (Applied Biosystems). Q-PCR was performed through SYBR green (Applied Biosystems). The sequences of the primers for SET1 and SET2 are as follows: SET1 (forward: AGTCTGCGATCCTGCCTCAG, reverse: AGCAGTGCAGACACTTGTGG), SET2 (forward: GCTCAACTCCAATCACGACG, reverse: AGCAGTGCAGACACTTGTGG). Mouse 18S primers (forward: GCCATGCATGTCTAAGTACGC, reverse: TCTGATAAATGCACGCATCC) were used for normalization.

### **Supplemental S1 legend**

Expression profiles of SET isoforms 1 and 2 during osteoclast differentiation. Total RNA was collected from *Pcdh7<sup>+/+</sup>* and *Pcdh7<sup>-/-</sup>* cultures and the levels of the indicated genes were measured by Q-PCR.
