# Supplementary figures and images for: Protocadherin-7 Regulates Osteoclast Differentiation through Intracellular SET-Binding Domain-Mediated RhoA and Rac1 Activation
Source: MDPI journal article supplement (doi:10.3390/ijms222313117), 2021-12-04

## Supplementary figure

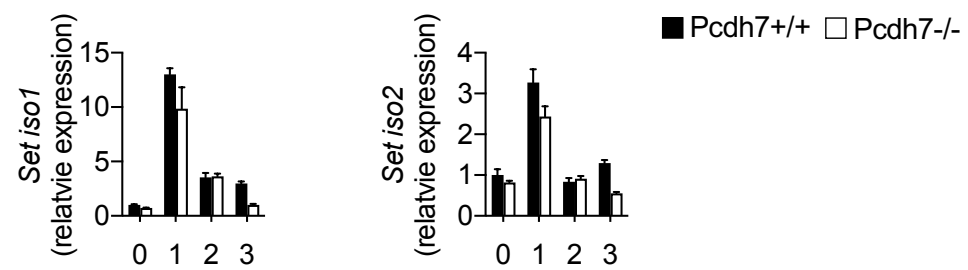

Supplement: s1 [file s1]
